# Supplementary material
Source: MDPI journal article supplement (https://www.mdpi.com/2304-6775/9/4/48)
Supplement: s1 [file s1]

*Supplementary Materials*

# Plagiarism through Paraphrasing Tools - the Story of One Plagiarized Text

Libor Ansorge <sup>1,\*</sup>, Klára Ansorgeová, <sup>2</sup> and Mark Sixsmith <sup>3</sup>

<sup>1</sup> TG Masaryk Water Research Institute, Podbabská 2582/30, 16000 Prague, Czech Republic

<sup>2</sup> Faculty of Science, Charles University, Albertov 6, 12800 Prague, Czech Republic; ansorgek@natur.cuni.cz

<sup>3</sup> Czech University of Life Sciences Prague, Kamýcká 129, 16500 Prague, Czech Republic; sixsmith@fzp.czu.cz

\* Correspondence: libor.ansorge@vuv.cz

**Table S1.** Text of original article, plagiarized text and paraphrased text.

|              | Original Text [1]                                                                                                                                                                                                                                                                                                                                                                                                                                                                                                                                                                                                                                                                                                                                                                                                                                                                                        | Plagiarised Text                                                                                                                                                                                                                                                                                                                                                                                                                                                                                                                                                                                                                                                                                                                                                                                                                                                                                                                                    | Paraphrased Text by <a href="https://paraphrasing-tool.com/">https://paraphrasing-tool.com/</a>                                                                                                                                                                                                                                                                                                                                                                                                                                                                                                                                                                                                                                                                                                                                                                                                                                            |
|--------------|----------------------------------------------------------------------------------------------------------------------------------------------------------------------------------------------------------------------------------------------------------------------------------------------------------------------------------------------------------------------------------------------------------------------------------------------------------------------------------------------------------------------------------------------------------------------------------------------------------------------------------------------------------------------------------------------------------------------------------------------------------------------------------------------------------------------------------------------------------------------------------------------------------|-----------------------------------------------------------------------------------------------------------------------------------------------------------------------------------------------------------------------------------------------------------------------------------------------------------------------------------------------------------------------------------------------------------------------------------------------------------------------------------------------------------------------------------------------------------------------------------------------------------------------------------------------------------------------------------------------------------------------------------------------------------------------------------------------------------------------------------------------------------------------------------------------------------------------------------------------------|--------------------------------------------------------------------------------------------------------------------------------------------------------------------------------------------------------------------------------------------------------------------------------------------------------------------------------------------------------------------------------------------------------------------------------------------------------------------------------------------------------------------------------------------------------------------------------------------------------------------------------------------------------------------------------------------------------------------------------------------------------------------------------------------------------------------------------------------------------------------------------------------------------------------------------------------|
| Title        | Advocating Water Literacy                                                                                                                                                                                                                                                                                                                                                                                                                                                                                                                                                                                                                                                                                                                                                                                                                                                                                | Encouraging Water Literacy                                                                                                                                                                                                                                                                                                                                                                                                                                                                                                                                                                                                                                                                                                                                                                                                                                                                                                                          | Supporting Water Literacy                                                                                                                                                                                                                                                                                                                                                                                                                                                                                                                                                                                                                                                                                                                                                                                                                                                                                                                  |
| Keywords     | Water literacy, water system, sustainability, local environment                                                                                                                                                                                                                                                                                                                                                                                                                                                                                                                                                                                                                                                                                                                                                                                                                                          | Water literacy, water framework, maintainability, neighborhood condition                                                                                                                                                                                                                                                                                                                                                                                                                                                                                                                                                                                                                                                                                                                                                                                                                                                                            | Water proficiency, water framework, manageability, neighborhood climate                                                                                                                                                                                                                                                                                                                                                                                                                                                                                                                                                                                                                                                                                                                                                                                                                                                                    |
| Abstract     | Current water use in our daily life is by no means sustainable, and the environmental and social problems come to the surface. To improve the current situation and to develop sustainably both for human beings and the global environment, we have to think out a new paradigm. As the centerpiece of the new paradigm, we advocate the concept of water literacy. Water literacy was defined as the ability to feel familiar with water, get actively involved in water and face the issue of water as one's own issue. Water literacy was divided into three categories: practical, living, and social water literacy. Water literacy enables us to re-evaluate local water systems and water usage. Furthermore, water literacy educates those citizens who are able to associate daily life with social issue, and contributes to the recovery of a variety of relations between water and humans. | Momentum water use in our day by day life is in no way, shape or form feasible, and the ecological and social issues rise to the top. To improve the present circumstance and to grow economically both for people and the worldwide condition, we need to thoroughly consider another worldview. As the focal point of the new worldview, we advocate the idea of water education. Water education was characterized as the capacity to feel acquainted with water, get effectively engaged with water and faces the issue of water as one's own issue. Water literacy was isolated into three classifications: down to earth, living, and social water education. Water literacy empowers us to rethink nearby water frameworks and water utilization. Moreover, water literacy teaches those residents who can connect every day existence with social issue, and adds to the recuperation of an assortment of relations among water and people. | Momentum water use in our day by day life is in no way, shape or form supportable, and the natural and social issues rise to the top. To advance the current circumstance and to grow reasonably both for people and the worldwide climate, we need to think out another worldview. As the focal point of the new worldview, we advocate the idea of water education. Water proficiency was characterized as the capacity to feel acquainted with water, get effectively engaged with water and face the issue of water as one's own issue. Water proficiency was separated into three classes: down to earth, living, and social water education. Water education empowers us to reexamine nearby water frameworks and water utilization. Moreover, water proficiency instructs those residents who can connect every day existence with social issue, and adds to the recuperation of an assortment of relations among water and people. |
|              | <b>1. Introduction</b>                                                                                                                                                                                                                                                                                                                                                                                                                                                                                                                                                                                                                                                                                                                                                                                                                                                                                   | <b>1. Introduction</b>                                                                                                                                                                                                                                                                                                                                                                                                                                                                                                                                                                                                                                                                                                                                                                                                                                                                                                                              | <b>1. Presentation</b>                                                                                                                                                                                                                                                                                                                                                                                                                                                                                                                                                                                                                                                                                                                                                                                                                                                                                                                     |
| 1. paragraph | Water that human beings can use is unevenly distributed on the earth not only spatially but also seasonally, and global warming will contribute to this tendency. Uneven distribution of water causes differences in water availability and know-how on how to obtain enough water, as well as customs in water use from location to location. To live and to                                                                                                                                                                                                                                                                                                                                                                                                                                                                                                                                            | Water that individuals can utilize is unevenly appropriated on the earth spatially as well as regularly, and an Earth-wide temperature boost will add to this inclination. Lopsided conveyance of water causes contrasts in water accessibility and expertise on the most proficient method to get enough water, just as customs in water use from area to area. To live and                                                                                                                                                                                                                                                                                                                                                                                                                                                                                                                                                                        | Water that individuals can utilize is unevenly disseminated on the earth spatially as well as occasionally, and an unnatural weather change will add to this propensity. Lopsided conveyance of water causes contrasts in water accessibility and expertise on the most proficient method to get sufficient water, just as customs in water use from one area to another.                                                                                                                                                                                                                                                                                                                                                                                                                                                                                                                                                                  |

|              |                                                                                                                                                                                                                                                                                                                                                                                                                                                                                                                                                                                                                                                                                                                                                                                                                                                                                                                                                                                                                                        |                                                                                                                                                                                                                                                                                                                                                                                                                                                                                                                                                                                                                                                                                                                                                                                                                                                                                                                                                                                                                                                                                          |                                                                                                                                                                                                                                                                                                                                                                                                                                                                                                                                                                                                                                                                                                                                                                                                                                                                                                                                                                                                                                                                                                                     |
|--------------|----------------------------------------------------------------------------------------------------------------------------------------------------------------------------------------------------------------------------------------------------------------------------------------------------------------------------------------------------------------------------------------------------------------------------------------------------------------------------------------------------------------------------------------------------------------------------------------------------------------------------------------------------------------------------------------------------------------------------------------------------------------------------------------------------------------------------------------------------------------------------------------------------------------------------------------------------------------------------------------------------------------------------------------|------------------------------------------------------------------------------------------------------------------------------------------------------------------------------------------------------------------------------------------------------------------------------------------------------------------------------------------------------------------------------------------------------------------------------------------------------------------------------------------------------------------------------------------------------------------------------------------------------------------------------------------------------------------------------------------------------------------------------------------------------------------------------------------------------------------------------------------------------------------------------------------------------------------------------------------------------------------------------------------------------------------------------------------------------------------------------------------|---------------------------------------------------------------------------------------------------------------------------------------------------------------------------------------------------------------------------------------------------------------------------------------------------------------------------------------------------------------------------------------------------------------------------------------------------------------------------------------------------------------------------------------------------------------------------------------------------------------------------------------------------------------------------------------------------------------------------------------------------------------------------------------------------------------------------------------------------------------------------------------------------------------------------------------------------------------------------------------------------------------------------------------------------------------------------------------------------------------------|
|              | use water sustainably, it is important to manage water through approaches appropriate to the local water environment. A uniform and concentrated water supply and disposal system has been constructed in many developed countries. However, this system is not sustainable because it ignores local characteristics and requires an immense amount of energy, cost, and effort to build and maintain. People who can use this kind of system are limited and the regional divide is widening. Although some developing countries have imitated and partly taken on the system, this does not necessarily mean that its operation and maintenance are doing well. Examples of this are a water leak that was not repaired and water quality that was not stabilized, even though considerable cost and effort were spent. There are many places where people are forced to manage in difficulty. Even in developed countries, it is a fact that environmental and social issues are caused by the harmful effects of advanced systems. | to utilize water reasonably, it is imperative to oversee water through approaches proper to the nearby water condition. A uniform and focused water supply and transfer framework has been built in many created nations. In any case, this framework isn't feasible in light of the fact that it disregards nearby qualities and requires a gigantic measure of vitality, cost, and exertion to construct and keep up. Individuals who can utilize this sort of framework are restricted and the local gap is extending. Albeit some creating nations have imitated and incompletely taken on the framework, this doesn't really imply that its activity and upkeep are progressing nicely. Instances of this are a water release that was not fixed and water quality that was not balanced out, despite the fact that impressive expense and exertion were spent. There are numerous spots where individuals are compelled to oversee in trouble. Indeed, even in created nations, natural and social issues are brought about by the destructive impacts of cutting edge frameworks. | To live and to utilize water reasonably, it is essential to oversee water through approaches proper to the neighborhood water climate. A uniform and thought water supply and removal framework has been built in many created nations. In any case, this framework isn't practical in light of the fact that it overlooks neighborhood attributes and requires a tremendous measure of energy, cost, and exertion to assemble and keep up. Individuals who can utilize this sort of framework are restricted and the territorial separation is extending. Albeit some agricultural nations have imitated and incompletely taken on the framework, this doesn't really imply that its activity and support are progressing admirably. Instances of this are a water release that was not fixed and water quality that was not balanced out, despite the fact that significant expense and exertion were spent. There are where individuals are compelled to oversee in trouble. Indeed, even in created nations, natural and social issues are brought about by the destructive impacts of cutting edge frameworks. |
| 2. paragraph | Currently, more than one billion people out of six billion people of the world population do not have access to safe water and more than three billion people cannot prevent water-related diseases because of the lack of sanitation. To improve the current situation and to develop sustainably both for human beings and the global environment, we have to think out a new paradigm, which requires a minimum of energy, cost and effort and fits the local environment. As the centerpiece of the new                                                                                                                                                                                                                                                                                                                                                                                                                                                                                                                            | At present, more than one billion individuals out of six billion individuals of the total populace don't approach safe water and beyond what three billion individuals can't forestall water-related sicknesses due to the absence of sanitation. To improve the present circumstance and to grow reasonably both for people and the worldwide condition, we need to thoroughly consider another worldview, which requires at least vitality, cost and exertion and fits the nearby condition. As the focal point of the new worldview, we advocate the idea of water education.                                                                                                                                                                                                                                                                                                                                                                                                                                                                                                         | As of now, more than one billion individuals out of six billion individuals of the total populace don't approach safe water and beyond what three billion individuals can't forestall water-related illnesses due to the absence of sterilization. To advance the current circumstance and to grow economically both for individuals and the worldwide climate, we need to think out another worldview, which requires at least energy, cost and exertion and fits the nearby climate. As the highlight of the new worldview, we advocate the idea of water education.                                                                                                                                                                                                                                                                                                                                                                                                                                                                                                                                              |

|               |                                                                                                                                                                                                                                                                                                                                                                                                                                                                                                                                                                                                                                                                                                                                                                                                                                                                                      |                                                                                                                                                                                                                                                                                                                                                                                                                                                                                                                                                                                                                                                                                                                                                                                                                                                         |                                                                                                                                                                                                                                                                                                                                                                                                                                                                                                                                                                                                                                                                                                                                                                                                                                                                      |
|---------------|--------------------------------------------------------------------------------------------------------------------------------------------------------------------------------------------------------------------------------------------------------------------------------------------------------------------------------------------------------------------------------------------------------------------------------------------------------------------------------------------------------------------------------------------------------------------------------------------------------------------------------------------------------------------------------------------------------------------------------------------------------------------------------------------------------------------------------------------------------------------------------------|---------------------------------------------------------------------------------------------------------------------------------------------------------------------------------------------------------------------------------------------------------------------------------------------------------------------------------------------------------------------------------------------------------------------------------------------------------------------------------------------------------------------------------------------------------------------------------------------------------------------------------------------------------------------------------------------------------------------------------------------------------------------------------------------------------------------------------------------------------|----------------------------------------------------------------------------------------------------------------------------------------------------------------------------------------------------------------------------------------------------------------------------------------------------------------------------------------------------------------------------------------------------------------------------------------------------------------------------------------------------------------------------------------------------------------------------------------------------------------------------------------------------------------------------------------------------------------------------------------------------------------------------------------------------------------------------------------------------------------------|
|               | paradigm, we advocate the concept of water literacy.                                                                                                                                                                                                                                                                                                                                                                                                                                                                                                                                                                                                                                                                                                                                                                                                                                 |                                                                                                                                                                                                                                                                                                                                                                                                                                                                                                                                                                                                                                                                                                                                                                                                                                                         |                                                                                                                                                                                                                                                                                                                                                                                                                                                                                                                                                                                                                                                                                                                                                                                                                                                                      |
|               | <b>2. Definition of Water Literacy</b>                                                                                                                                                                                                                                                                                                                                                                                                                                                                                                                                                                                                                                                                                                                                                                                                                                               | <b>2. Definition of Water Literacy</b>                                                                                                                                                                                                                                                                                                                                                                                                                                                                                                                                                                                                                                                                                                                                                                                                                  | <b>2. Meaning of Water Literacy</b>                                                                                                                                                                                                                                                                                                                                                                                                                                                                                                                                                                                                                                                                                                                                                                                                                                  |
| 1. para-graph | Here, we define water literacy as the ability to feel familiar with water, get actively involved in water and face the issue of water as one's own issue. Being water literate means understanding how the water we use daily is delivered and treated, as well as knowing the quality and safety of that water, how much water we use daily and exactly what we use it for.                                                                                                                                                                                                                                                                                                                                                                                                                                                                                                         | Here, we characterize water literacy as the capacity to feel acquainted with water, get effectively associated with water and face the issue of water as one's claim issue. Being water educated methods seeing how the water we utilize every day is conveyed and treated, just as knowing the quality and wellbeing of that water, how much water we utilize day by day and precisely what we use it for.                                                                                                                                                                                                                                                                                                                                                                                                                                             | Here, we characterize water education as the capacity to feel acquainted with water, get effectively associated with water and face the issue of water as one's own issue. Being water proficient methods seeing how the water we utilize every day is conveyed and treated, just as knowing the quality and wellbeing of that water, how much water we utilize day by day and precisely what we use it for.                                                                                                                                                                                                                                                                                                                                                                                                                                                         |
| 2. para-graph | Recently, the concept of literacy has been expanded to include other genres of literacy such as scientific literacy, media literacy, information literacy and environmental literacy.                                                                                                                                                                                                                                                                                                                                                                                                                                                                                                                                                                                                                                                                                                | As of late, the idea of literacy has been extended to incorporate different classifications of education, for example, logical education, media literacy, data education and ecological literacy.                                                                                                                                                                                                                                                                                                                                                                                                                                                                                                                                                                                                                                                       | As of late, the idea of proficiency has been extended to incorporate different sorts of education like logical education, media education, data education and ecological education.                                                                                                                                                                                                                                                                                                                                                                                                                                                                                                                                                                                                                                                                                  |
| 3. para-graph | The original meaning of the word "literacy" was the ability to read and write. At the beginning of the modern era, the word referred to the ability to communicate effectively in a literate society, and was valued as a tool for personal success [1]. King [2] called this original literacy functional literacy. He suggested that a person who was merely functionally literate was essentially passive, even if he or she could fit into the pre-existing structure of social life and perform its routine operations well. Over time, the meaning of literacy changed, and was used in a broader sense. UNESCO's definition of literacy includes not only functional literacy, but also the ability to engage with society and communicate actively. This means that the concept of literacy is no longer passive, and thus has been expanded for use in a variety of fields. | The first importance of the word "literacy" was the capacity to peruse and compose. Toward the start of the advanced period, the word alluded to the capacity to impart successfully in a proficient society, and was esteemed as an apparatus for individual achievement. Ruler called this unique literacy practical education. He recommended that an individual who was just practically educated was basically uninvolved, regardless of whether the person could fit into the previous structure of public activity and play out its normal tasks well. After some time, the importance of education changed, and was utilized in a more extensive sense. UNESCO's meaning of education incorporates practical literacy, yet in addition the capacity to connect with society and convey effectively. This implies the idea of education is never | The first significance of "proficiency" was the capacity to peruse and compose. Toward the start of the advanced period, the word alluded to the capacity to impart viably in a proficient society, and was esteemed as an instrument for individual achievement [1]. Ruler [2] called this unique proficiency utilitarian education. He recommended that an individual who was just practically educated was basically uninvolved, regardless of whether the person could find a way into the prior construction of public activity and play out its normal tasks well. Over the long run, the importance of proficiency changed, and was utilized from a more extensive perspective. UNESCO's meaning of education incorporates practical proficiency, yet additionally the capacity to draw in with society and impart effectively. This implies that the idea of |

|              |                                                                                                                                                                                                                                                                                                                                                                                                                                                                                                                                                                                                                                                                                                                                                           |                                                                                                                                                                                                                                                                                                                                                                                                                                                                                                                                                                                                                                                                                                                                                                                           |                                                                                                                                                                                                                                                                                                                                                                                                                                                                                                                                                                                                                                                                                                                                                                     |
|--------------|-----------------------------------------------------------------------------------------------------------------------------------------------------------------------------------------------------------------------------------------------------------------------------------------------------------------------------------------------------------------------------------------------------------------------------------------------------------------------------------------------------------------------------------------------------------------------------------------------------------------------------------------------------------------------------------------------------------------------------------------------------------|-------------------------------------------------------------------------------------------------------------------------------------------------------------------------------------------------------------------------------------------------------------------------------------------------------------------------------------------------------------------------------------------------------------------------------------------------------------------------------------------------------------------------------------------------------------------------------------------------------------------------------------------------------------------------------------------------------------------------------------------------------------------------------------------|---------------------------------------------------------------------------------------------------------------------------------------------------------------------------------------------------------------------------------------------------------------------------------------------------------------------------------------------------------------------------------------------------------------------------------------------------------------------------------------------------------------------------------------------------------------------------------------------------------------------------------------------------------------------------------------------------------------------------------------------------------------------|
|              |                                                                                                                                                                                                                                                                                                                                                                                                                                                                                                                                                                                                                                                                                                                                                           | again detached, and therefore has been extended for use in an assortment of fields.                                                                                                                                                                                                                                                                                                                                                                                                                                                                                                                                                                                                                                                                                                       | education is not, at this point inactive, and hence has been extended for use in an assortment of fields.                                                                                                                                                                                                                                                                                                                                                                                                                                                                                                                                                                                                                                                           |
| 4. paragraph | Scientific literacy, for example, meant the knowledge and understanding of nature and the concepts of science and technology. It is essential to have scientific literacy to live in modern society, where science and technology have progressed very rapidly and have been used for imminent environment such as health, energy, resources, environment, food, agriculture, communication, etc. In this context, scientific literacy is not only the ability to understand science and technology, but also the ability to use scientific processes to solve problems and make decisions, and the ability to understand both the ethical and negative aspects of science. Modern scientific literacy includes behavior, functional knowledge and skill. | Logical literacy, for instance, implied the information and comprehension of nature and the ideas of science and innovation. It is basic to have logical literacy to live in current society, where science and innovation have advanced quickly and have been utilized for fast approaching condition, for example, wellbeing, vitality, assets, condition, nourishment, agribusiness, correspondence, and so on. In this unique circumstance, logical education isn't just the capacity to get science and innovation, yet in addition the capacity to utilize logical procedures to take care of issues and decide, and the capacity to comprehend both the moral and negative parts of science. Present day logical literacy incorporates conduct, practical information and ability. | Logical proficiency, for instance, implied the information and comprehension of nature and the ideas of science and innovation. It is fundamental to have logical education to live in current culture, where science and innovation have advanced quickly and have been utilized for inevitable climate like wellbeing, energy, assets, climate, food, farming, correspondence, and so forth In this specific situation, logical education isn't just the capacity to get science and innovation, yet additionally the capacity to utilize logical cycles to take care of issues and decide, and the capacity to comprehend both the moral and negative parts of science. Current logical proficiency incorporates conduct, utilitarian information and expertise. |
| 5. paragraph | The concept of environmental literacy was introduced at the end of the 1960s in the context of environmental education. The term was mainly applied to scientific knowledge about nature and its processes. Those who were environmentally conscious were expected to behave in a responsible manner. Since that time, various definitions have been put forward for this concept. Roth [3] defined environmental literacy as an individual's knowledge about and attitudes toward the environment and environmental issues; the skills and motivation to work toward the environment, and active involvement in working towards the maintenance of dynamic equilibrium between the quality of life and the quality of the environment.                   | The idea of ecological literacy was presented toward the finish of the 1960s with regards to natural instruction. The term was primarily applied to logical information about nature and its procedures. The individuals who were naturally cognizant were required to carry on in a dependable way. Since that time, different definitions have been advanced for this idea. Roth characterized ecological education as an individual's information about and dispositions toward the earth and natural issues; the abilities and inspiration to move in the direction of the earth, and dynamic contribution in moving in the direction of the upkeep of dynamic balance between the personal satisfaction and the nature of the earth.                                                 | The idea of ecological proficiency was presented toward the finish of the 1960s with regards to natural training. The term was primarily applied to logical information about nature and its cycles. The individuals who were ecologically cognizant were relied upon to carry on in a capable way. Since that time, different definitions have been advanced for this idea. Roth [3] characterized ecological education as a person's information about and perspectives toward the climate and natural issues; the abilities and inspiration to run after the climate, and dynamic association in pursuing the upkeep of dynamic harmony between the personal satisfaction and the nature of the climate.                                                         |

|              |                                                                                                                                                                                                                                                                                                                                                                                                                                                                                                                                                                                                                                                                               |                                                                                                                                                                                                                                                                                                                                                                                                                                                                                                                                                                                                                                                                                                                         |                                                                                                                                                                                                                                                                                                                                                                                                                                                                                                                                                                                                                                                                                                                                                          |
|--------------|-------------------------------------------------------------------------------------------------------------------------------------------------------------------------------------------------------------------------------------------------------------------------------------------------------------------------------------------------------------------------------------------------------------------------------------------------------------------------------------------------------------------------------------------------------------------------------------------------------------------------------------------------------------------------------|-------------------------------------------------------------------------------------------------------------------------------------------------------------------------------------------------------------------------------------------------------------------------------------------------------------------------------------------------------------------------------------------------------------------------------------------------------------------------------------------------------------------------------------------------------------------------------------------------------------------------------------------------------------------------------------------------------------------------|----------------------------------------------------------------------------------------------------------------------------------------------------------------------------------------------------------------------------------------------------------------------------------------------------------------------------------------------------------------------------------------------------------------------------------------------------------------------------------------------------------------------------------------------------------------------------------------------------------------------------------------------------------------------------------------------------------------------------------------------------------|
| 6. paragraph | This paper aims to advance the new concept of water literacy and to discuss its implications. Although Ewing and Mills [4] used the term to mean knowledge regarding water in the context of environmental education, they did not define and examine its meaning and importance.                                                                                                                                                                                                                                                                                                                                                                                             | This paper means to propel the new idea of water education and to talk about its suggestions. Despite the fact that Ewing and Mills utilized the term to mean information in regards to water with regards to ecological instruction, they didn't characterize and inspect its significance and significance.                                                                                                                                                                                                                                                                                                                                                                                                           | This paper means to propel the new idea of water proficiency and to examine its suggestions. In spite of the fact that Ewing and Mills [4] utilized the term to mean information in regards to water with regards to ecological instruction, they didn't characterize and analyze its significance and significance                                                                                                                                                                                                                                                                                                                                                                                                                                      |
| 7. paragraph | Water literacy seems to be a different kind of literacy from other genres of it. For example, of media literacy, there surely exists the question, "What is media?" because media is always changing. However, there is no need to ask "What is water?" because water, H <sub>2</sub> O, is a universal substance both physically and chemically. Water needs literacy in spite of this fact because its value and what it ought to be is socially determined by people's consciousness of the relationship between people and water. Thus, water exists socially, which makes it the subject of the literacy concept, as is information, media, science and the environment. | Water literacy is by all accounts an alternate sort of education from different types of it. For instance, of media literacy, there without a doubt exists the inquiry, "What is media?" since media is continually evolving. Notwithstanding, there is no compelling reason to ask "What is water?" since water, H <sub>2</sub> O, is a widespread substance both physically and synthetically. Water needs education disregarding this reality since its worth and what it should be is socially controlled by people's awareness of the connection among individuals and water. Along these lines, water exists socially, which makes it the subject of the literacy idea, as is data, media, science and the earth. | Water proficiency is by all accounts an alternate sort of education from different types of it. For instance, of media education, there unquestionably exists the inquiry, "What is media?" in light of the fact that media is continually evolving. Be that as it may, there is no compelling reason to ask "What is water?" since water, H <sub>2</sub> O, is a widespread substance both genuinely and synthetically. Water needs proficiency disregarding this reality since its worth and what it should be is socially dictated by individuals' awareness of the connection among individuals and water. Along these lines, water exists socially, which makes it the subject of the proficiency idea, as is data, media, science and the climate. |
| 8. paragraph | In this paper, water withdrawal, use and disposal, were assessed as a unit, and this was called the water system. Industrialization brought efficient water systems with it, especially in urban areas, and this was called the modern water system. This modern water system was composed of treating water, supplying water via pipes, disposing of waste water through sewage systems, and collecting and treating that waste water in sewage plants.                                                                                                                                                                                                                      | In this paper, water withdrawal, use and transfer, were surveyed as a unit, and this was known as the water framework. Industrialization carried proficient water frameworks with it, particularly in urban territories, and this was known as the cutting edge water framework. This advanced water framework was made out of treating water, providing water by means of channels, discarding waste water through sewage frameworks, and gathering and treating that waste water in sewage plants.                                                                                                                                                                                                                    | In this paper, water withdrawal, use and removal, were surveyed as a unit, and this was known as the water framework. Industrialization carried effective water frameworks with it, particularly in metropolitan regions, and this was known as the advanced water framework. This advanced water framework was made out of treating water, providing water by means of lines, discarding waste water through sewage frameworks, and gathering and treating that waste water in sewage plants.                                                                                                                                                                                                                                                           |
|              | <b>3. Classification of Water Literacy</b>                                                                                                                                                                                                                                                                                                                                                                                                                                                                                                                                                                                                                                    | <b>3. Classification of Water Literacy</b>                                                                                                                                                                                                                                                                                                                                                                                                                                                                                                                                                                                                                                                                              | <b>3. Characterization of Water Literacy</b>                                                                                                                                                                                                                                                                                                                                                                                                                                                                                                                                                                                                                                                                                                             |

|              |                                                                                                                                                                                                                                                                                                                                                                                                                 |                                                                                                                                                                                                                                                                                                                                                                                                                          |                                                                                                                                                                                                                                                                                                                                                                                                           |
|--------------|-----------------------------------------------------------------------------------------------------------------------------------------------------------------------------------------------------------------------------------------------------------------------------------------------------------------------------------------------------------------------------------------------------------------|--------------------------------------------------------------------------------------------------------------------------------------------------------------------------------------------------------------------------------------------------------------------------------------------------------------------------------------------------------------------------------------------------------------------------|-----------------------------------------------------------------------------------------------------------------------------------------------------------------------------------------------------------------------------------------------------------------------------------------------------------------------------------------------------------------------------------------------------------|
| 1. paragraph | As mentioned in the Introduction, to use water sustainably, it is important to build and manage a water system that fits the local environment. Requisite water literacy varies depending on the local environment.                                                                                                                                                                                             | As referenced in the Introduction, to utilize water economically, it is critical to construct and deal with a water framework that fits the nearby condition. Essential water education changes relying upon the nearby environment.                                                                                                                                                                                     | As referenced in the Introduction, to utilize water reasonably, it is critical to fabricate and deal with a water framework that fits the nearby climate. Imperative water proficiency changes relying upon the nearby climate.                                                                                                                                                                           |
| 2. paragraph | Thus, we have divided water literacy into three categories as described below.                                                                                                                                                                                                                                                                                                                                  | Thus, we have separated water literacy into three classifications as portrayed underneath.                                                                                                                                                                                                                                                                                                                               | In this manner, we have partitioned water education into three classes as depicted underneath.                                                                                                                                                                                                                                                                                                            |
| 3. paragraph | (1) Practical water literacy                                                                                                                                                                                                                                                                                                                                                                                    | a. Practical water literacy                                                                                                                                                                                                                                                                                                                                                                                              | (1) Practical water proficiency                                                                                                                                                                                                                                                                                                                                                                           |
| 4. paragraph | Safe water is a matter of life and death. It is essential to ensure that water is usable. Practical water literacy means having the knowledge to ensure the vital amount and quality of water. This is necessary for human survival. Practical water literacy includes such aspects as knowing not to drink unsanitary water and understanding the importance of hand washing.                                  | Safe water involves life and passing. It is basic to guarantee that water is usable. Pragmatic water literacy implies having the information to guarantee the essential sum and nature of water. This is fundamental for human endurance. Handy water education incorporates such angles as knowing not to drink unsanitary water and understanding the significance of hand washing.                                    | Safe water involves life and passing. It is fundamental to guarantee that water is usable. Pragmatic water education implies having the information to guarantee the essential sum and nature of water. This is important for human endurance. Reasonable water proficiency incorporates such perspectives as realizing not to drink unsanitary water and understanding the significance of hand washing. |
| 5. paragraph | (2) Living water literacy                                                                                                                                                                                                                                                                                                                                                                                       | b. Living water literacy                                                                                                                                                                                                                                                                                                                                                                                                 | (2) Living water education                                                                                                                                                                                                                                                                                                                                                                                |
| 6. paragraph | Living water literacy means the ability to use water wisely in the home and social space in one's own backyard. This is necessary to ensure an adequate supply of quality water so that everyone will have enough to live healthy lives.                                                                                                                                                                        | Living water literacy implies the capacity to utilize water astutely in the home and social space in one's claim patio. This is important to guarantee a sufficient inventory of value water so everybody will have enough to live solid lives.                                                                                                                                                                          | Living water education implies the capacity to utilize water shrewdly in the home and social space in one's own patio. This is important to guarantee a satisfactory stock of value water with the goal that everybody will have enough to carry on with sound lives.                                                                                                                                     |
| 7. paragraph | For example, if people use collected rainwater, living water literacy would involve things such as removing stains from roofs where rainwater is collected and allowing sufficient time for sedimentation. For apartment dwellers in urban areas, living water literacy would involve keeping water tanks clean. For people who use septic tanks, it is their responsibility to keep them functioning properly. | For instance, if individuals utilize gathered water, living water literacy would include things, for example, expelling stains from rooftops where water is gathered and permitting adequate time for sedimentation. For condo inhabitants in urban zones, living water literacy would include keeping water tanks clean. For individuals who utilize septic tanks, it is their duty to keep them working appropriately. | For instance, if individuals utilize gathered water, living water proficiency would include things, for example, eliminating stains from rooftops where water is gathered and permitting adequate time for sedimentation. For condo occupants in metropolitan territories, living water education would include keeping water tanks clean. For individuals who utilize                                    |

|               |                                                                                                                                                                                                                                                                                                                                                                                                                                                                                                                                                                                                                                                                                                                                                                        |                                                                                                                                                                                                                                                                                                                                                                                                                                                                                                                                                                                                                                                                                                                                                  |                                                                                                                                                                                                                                                                                                                                                                                                                                                                                                                                                                                                                                                                                                                                                                                                          |
|---------------|------------------------------------------------------------------------------------------------------------------------------------------------------------------------------------------------------------------------------------------------------------------------------------------------------------------------------------------------------------------------------------------------------------------------------------------------------------------------------------------------------------------------------------------------------------------------------------------------------------------------------------------------------------------------------------------------------------------------------------------------------------------------|--------------------------------------------------------------------------------------------------------------------------------------------------------------------------------------------------------------------------------------------------------------------------------------------------------------------------------------------------------------------------------------------------------------------------------------------------------------------------------------------------------------------------------------------------------------------------------------------------------------------------------------------------------------------------------------------------------------------------------------------------|----------------------------------------------------------------------------------------------------------------------------------------------------------------------------------------------------------------------------------------------------------------------------------------------------------------------------------------------------------------------------------------------------------------------------------------------------------------------------------------------------------------------------------------------------------------------------------------------------------------------------------------------------------------------------------------------------------------------------------------------------------------------------------------------------------|
|               |                                                                                                                                                                                                                                                                                                                                                                                                                                                                                                                                                                                                                                                                                                                                                                        |                                                                                                                                                                                                                                                                                                                                                                                                                                                                                                                                                                                                                                                                                                                                                  | septic tanks, it is their obligation to keep them working appropriately.                                                                                                                                                                                                                                                                                                                                                                                                                                                                                                                                                                                                                                                                                                                                 |
| 8. paragraph  | (3) Social water literacy                                                                                                                                                                                                                                                                                                                                                                                                                                                                                                                                                                                                                                                                                                                                              | c. Social water literacy                                                                                                                                                                                                                                                                                                                                                                                                                                                                                                                                                                                                                                                                                                                         | (3) Social water education                                                                                                                                                                                                                                                                                                                                                                                                                                                                                                                                                                                                                                                                                                                                                                               |
| 9. paragraph  | Social water literacy refers to willingness to act responsibly and make reasonable decisions for society as a whole in terms of water usage. To find optimum solutions to the water issues in our modern society, we have to think from the point of view of politics, economics, society as a whole, technology and the environment. We have to think about water resources, water treatment, water delivery and waste water treatment from various angles. Citizens' ability to monitor water resource management of municipality and their ability to suggest practical improvements are important aspects of social water literacy.                                                                                                                                | Social water literacy alludes to eagerness to act dependably and settle on sensible choices for society all in all as far as water utilization. To discover ideal answers for the water issues in our cutting edge society, we need to think from the perspective of legislative issues, financial matters, society in general, innovation and nature. We need to consider water assets, water treatment, water conveyance and waste water treatment from different edges. Citizens' capacity to screen water asset the executives of region and their capacity to propose pragmatic upgrades are significant parts of social water literacy.                                                                                                    | Social water proficiency alludes to readiness to act dependably and settle on sensible choices for society all in all regarding water utilization. To discover ideal answers for the water issues in our advanced society, we need to think according to the perspective of governmental issues, financial aspects, society overall, innovation and the climate. We need to consider water assets, water treatment, water conveyance and waste water treatment from different points. Citizens' capacity to screen water asset the executives of region and their capacity to propose viable upgrades are significant parts of social water education.                                                                                                                                                   |
| 10. paragraph | Although practical and living water literacies are both necessary for daily life, social water literacy is not. Social water literacy involves thinking about water from a broader perspective. For example, where there are closed water areas such as lakes attached to a river, a typical environmental issue is eutrophication, an abundance of chemical nutrients caused by nitrogen and phosphorus discharged into water from sewage. Social water literacy needed there is not to discharge food residue, which is the source of nitrogen and phosphorus. Meanwhile, in urban areas without enough water resources, water saving is important. Social water literacy there is, for example, to use water in multiple stages and to turn faucets off frequently. | Though common sense and living water skill levels are both essential for day by day life, social water literacy isn't. Social water education includes pondering water from a more extensive viewpoint. For instance, where there are shut water zones, for example, lakes appended to a waterway, a commonplace ecological issue is eutrophication, a wealth of concoction supplements brought about by nitrogen and phosphorus released into water from sewage. Social water education required there isn't to release nourishment build-up, which is the wellspring of nitrogen and phosphorus. In the interim, in urban regions without enough water assets, water sparing is significant. Social water education there is, for instance, to | Albeit useful and living water skill levels are both vital for every day life, social water proficiency isn't. Social water education includes pondering water from a more extensive viewpoint. For instance, where there are shut water territories, for example, lakes joined to a stream, an average ecological issue is eutrophication, a wealth of synthetic supplements brought about by nitrogen and phosphorus released into water from sewage. Social water education required there isn't to release food build-up, which is the wellspring of nitrogen and phosphorus. Then, in metropolitan zones without sufficient water assets, water saving is significant. Social water education there is, for instance, to utilize water in numerous stages and to turn spigots off much of the time. |



|               |                                                                                                                                                                                                                                                                                                                                                                                                                                                                                                                                 |                                                                                                                                                                                                                                                                                                                                                                                                                                                                                                                                                      |                                                                                                                                                                                                                                                                                                                                                                                                                                                                                                                                                                       |
|---------------|---------------------------------------------------------------------------------------------------------------------------------------------------------------------------------------------------------------------------------------------------------------------------------------------------------------------------------------------------------------------------------------------------------------------------------------------------------------------------------------------------------------------------------|------------------------------------------------------------------------------------------------------------------------------------------------------------------------------------------------------------------------------------------------------------------------------------------------------------------------------------------------------------------------------------------------------------------------------------------------------------------------------------------------------------------------------------------------------|-----------------------------------------------------------------------------------------------------------------------------------------------------------------------------------------------------------------------------------------------------------------------------------------------------------------------------------------------------------------------------------------------------------------------------------------------------------------------------------------------------------------------------------------------------------------------|
|               |                                                                                                                                                                                                                                                                                                                                                                                                                                                                                                                                 | utilize water in different stages and to turn spigots off habitually.                                                                                                                                                                                                                                                                                                                                                                                                                                                                                |                                                                                                                                                                                                                                                                                                                                                                                                                                                                                                                                                                       |
| 11. paragraph | These three types of water literacy need to be taken by all people. However, the priority of and the concrete actions for each type of water literacy vary depending on the situation of the habitation area. We show the intended spaces and some examples of the concrete actions in Table.1. Figure.1 explains the concept of three types of water literacy. Awareness for water decreases as the space shifts from private to public. The water literacy will act as a catalyst to raise the awareness to the target level. | These three kinds of water education should be taken by all individuals. Notwithstanding, the need of and the solid activities for each kind of water education change contingent upon the circumstance of the residence zone. We show the planned spaces and some case of the solid activities in Table.1. Figure.1 clarifies the idea of three kinds of water education. Mindfulness for water diminishes as the space shifts from private to open. The water education will go about as an impetus to raise the attention to the objective level. | These three sorts of water education should be taken by all individuals. Be that as it may, the need of and the solid activities for each sort of water education change contingent upon the circumstance of the residence region. We show the proposed spaces and some illustration of the solid activities in Table.1. Figure.1 clarifies the idea of three sorts of water proficiency. Mindfulness for water diminishes as the space shifts from private to public. The water education will go about as an impetus to raise the attention to the objective level. |
|               | Table 1 Classification of water literacy                                                                                                                                                                                                                                                                                                                                                                                                                                                                                        | ---                                                                                                                                                                                                                                                                                                                                                                                                                                                                                                                                                  |                                                                                                                                                                                                                                                                                                                                                                                                                                                                                                                                                                       |
|               | Figure 1 Concept of water literacy                                                                                                                                                                                                                                                                                                                                                                                                                                                                                              | ---                                                                                                                                                                                                                                                                                                                                                                                                                                                                                                                                                  |                                                                                                                                                                                                                                                                                                                                                                                                                                                                                                                                                                       |
|               | <b>4. Need for the Concept of Water Literacy</b>                                                                                                                                                                                                                                                                                                                                                                                                                                                                                | <b>4. Need for the Concept of Water Literacy</b>                                                                                                                                                                                                                                                                                                                                                                                                                                                                                                     | <b>4. Need for the Concept of Water Literacy</b>                                                                                                                                                                                                                                                                                                                                                                                                                                                                                                                      |
| 1. paragraph  | Here, why the concept of water literacy is essential for sustainable development is examined by reviewing the historical transition of our relationship with water.                                                                                                                                                                                                                                                                                                                                                             | Here, why the idea of water education is basic for supportable advancement is inspected by evaluating the recorded progress of our association with water.                                                                                                                                                                                                                                                                                                                                                                                           | Here, why the idea of water education is fundamental for maintainable improvement is inspected by looking into the recorded progress of our relationship with water.                                                                                                                                                                                                                                                                                                                                                                                                  |
|               | <b>4.1 Reviewing the Historical Transition of Our Relationship with Water and Formation of the Modern Water System</b>                                                                                                                                                                                                                                                                                                                                                                                                          | <b>4.1 Reviewing the Historical Transition of Our Relationship with Water and Formation of the Modern Water System</b>                                                                                                                                                                                                                                                                                                                                                                                                                               | <b>4.1 Reviewing the Historical Transition of Our Relationship with Water and Formation of the Modern Water System</b>                                                                                                                                                                                                                                                                                                                                                                                                                                                |
| 1. paragraph  | We cannot live without water. It is not simply necessary to sustain life, but is one of the very foundations of human life. Our relationship with water has always had a great effect on where and how we live. For example, ancient civilizations emerged and developed near great rivers. The regulation and utilization of water was a great challenge for ancient citizens and rulers. Water in ancient Rome                                                                                                                | We can't live without water. It isn't just important to continue life, however is one of the very establishments of human life. Our association with water has consistently greatly affected where and how we live. For instance, old human advancements rose and created close to extraordinary streams. The guideline and usage of water was an extraordinary test for old residents and rulers. Water in antiquated Rome was                                                                                                                      | We can't live without water. It isn't just important to support life, yet is one of the actual establishments of human existence. Our relationship with water has consistently greatly affected where and how we live. For instance, old civilizations arose and created close to extraordinary waterways. The guideline and usage of water was an incredible test for old residents and rulers. Water in antiquated Rome was provided from                                                                                                                           |

|              |                                                                                                                                                                                                                                                                                                                                                                                                                                                                                                                                                                                                                                                                                                                                                                                                                                                                          |                                                                                                                                                                                                                                                                                                                                                                                                                                                                                                                                                                                                                                                                                                                                                                                                                                                                                                                                                                               |                                                                                                                                                                                                                                                                                                                                                                                                                                                                                                                                                                                                                                                                                                                                                                                                                                                                                                                                      |
|--------------|--------------------------------------------------------------------------------------------------------------------------------------------------------------------------------------------------------------------------------------------------------------------------------------------------------------------------------------------------------------------------------------------------------------------------------------------------------------------------------------------------------------------------------------------------------------------------------------------------------------------------------------------------------------------------------------------------------------------------------------------------------------------------------------------------------------------------------------------------------------------------|-------------------------------------------------------------------------------------------------------------------------------------------------------------------------------------------------------------------------------------------------------------------------------------------------------------------------------------------------------------------------------------------------------------------------------------------------------------------------------------------------------------------------------------------------------------------------------------------------------------------------------------------------------------------------------------------------------------------------------------------------------------------------------------------------------------------------------------------------------------------------------------------------------------------------------------------------------------------------------|--------------------------------------------------------------------------------------------------------------------------------------------------------------------------------------------------------------------------------------------------------------------------------------------------------------------------------------------------------------------------------------------------------------------------------------------------------------------------------------------------------------------------------------------------------------------------------------------------------------------------------------------------------------------------------------------------------------------------------------------------------------------------------------------------------------------------------------------------------------------------------------------------------------------------------------|
|              | <p>was supplied from distant springs using aqueducts. People could not live in Rome, if there was not the technology to construct aqueducts. Meanwhile, qanats were a common water management system to provide a reliable supply of water in arid regions such as Iran and parts of Spain. Qanats were constructed as a series of well-like vertical shafts, connected by gently sloping tunnels. Because water flowed underground, loss by seepage and evaporation could be avoided. Furthermore, people living in Suzhou and its neighboring area in mainland China actively used its abundance of rainfall, storing rainwater in large jars and flowing water in channels. In ancient times, people had the practical water literacy necessary for survival, living water literacy for daily life, and social water literacy to survive as a balanced community.</p> | <p>provided from inaccessible springs utilizing reservoir conduits. Individuals couldn't live in Rome, if there was not the innovation to develop water channels. In the interim, qanats were a typical water the board framework to give a solid stock of water in bone-dry districts, for example, Iran and parts of Spain. Qanats were developed as a progression of well-like vertical shafts, associated by delicately slanting passages. Since water streamed underground, misfortune by drainage and dissipation could be stayed away from. Besides, individuals living in Suzhou and its neighboring region in terrain China effectively utilized its plenitude of precipitation, putting away water in enormous containers and streaming water in channels. In old occasions, individuals had the down to earth water literacy important for endurance, living water education for everyday life, and social water literacy to make due as a reasonable network.</p> | <p>far off springs utilizing reservoir conduits. Individuals couldn't live in Rome, if there was not the innovation to build water passages. Then, qanats were a typical water the executives framework to give a solid inventory of water in bone-dry areas like Iran and parts of Spain. Qanats were built as a progression of well-like vertical shafts, associated by tenderly inclining burrows. Since water streamed underground, misfortune by drainage and dissipation could be stayed away from. Moreover, individuals living in Suzhou and its adjoining zone in territory China effectively utilized its wealth of precipitation, putting away water in enormous containers and streaming water in channels. In antiquated occasions, individuals had the reasonable water proficiency essential for endurance, living water education for every day life, and social water education to get by as a fair local area.</p> |
| 2. paragraph | <p>The industrial revolution, the technological advancements of modernization and the spread of capitalist economies have changed peoples' lives significantly, especially in terms of their relationship with water. Various technological developments, such as the regulation and utilization of water by damming and efficient water delivery, have enabled us to live in areas far from water resources. Therefore, the places where people lived became diversified. The cholera pandemic in the 19th century, when people were concentrated in urban areas and when national and international trade ex-</p>                                                                                                                                                                                                                                                      | <p>The mechanical upheaval, the innovative headways of modernization and the spread of industrialist economies have changed peoples' lives essentially, particularly as far as their association with water. Different innovative advancements, for example, the guideline and use of water by damming and effective water conveyance, have empowered us to live in territories a long way from water assets. In this manner, the spots where individuals lived got enhanced. The cholera pandemic in the nineteenth century, when individuals were amassed in urban regions and when national and universal exchange extended def-</p>                                                                                                                                                                                                                                                                                                                                       | <p>The mechanical upheaval, the innovative headways of modernization and the spread of industrialist economies have changed peoples' lives fundamentally, particularly as far as their relationship with water. Different mechanical turns of events, for example, the guideline and usage of water by damming and productive water conveyance, have empowered us to live in territories a long way from water assets. Thusly, where individuals lived got enhanced. The cholera pandemic in the nineteenth century, when individuals were moved in metropolitan regions and when public and global exchange extended definitely, sped up the execution of the brought together</p>                                                                                                                                                                                                                                                  |

|               |                                                                                                                                                                                                                                                                                                                                                                                                                                                                                                                                                                                                                                            |                                                                                                                                                                                                                                                                                                                                                                                                                                                                                                                                                                                                                                                                    |                                                                                                                                                                                                                                                                                                                                                                                                                                                                                                                                                                                                    |
|---------------|--------------------------------------------------------------------------------------------------------------------------------------------------------------------------------------------------------------------------------------------------------------------------------------------------------------------------------------------------------------------------------------------------------------------------------------------------------------------------------------------------------------------------------------------------------------------------------------------------------------------------------------------|--------------------------------------------------------------------------------------------------------------------------------------------------------------------------------------------------------------------------------------------------------------------------------------------------------------------------------------------------------------------------------------------------------------------------------------------------------------------------------------------------------------------------------------------------------------------------------------------------------------------------------------------------------------------|----------------------------------------------------------------------------------------------------------------------------------------------------------------------------------------------------------------------------------------------------------------------------------------------------------------------------------------------------------------------------------------------------------------------------------------------------------------------------------------------------------------------------------------------------------------------------------------------------|
|               | panded drastically, accelerated the implementation of the centralized modern water system. At that time, investigation into the cause of cholera was complicated; various incorrect theories were put forward and correct action was not taken. Afterward, the discovery of vibrio cholera in 1883 and the decrease of water-borne diseases, such as cholera and typhoid, by the supply of filtered water resulted in the accelerated spread of a modern water supply to many parts of the world. Because of this great transformation in the 19th century, the standardized modern water system is used similarly in developed countries. | initely, quickened the usage of the incorporated present day water framework. Around then, examination concerning the reason for cholera was muddled; different off base speculations were advanced and right move was not made. A short time later, the disclosure of vibrio cholera in 1883 and the lessening of water-borne sicknesses, for example, cholera and typhoid, by the inventory of sifted water brought about the quickened spread of a cutting edge water supply to numerous pieces of the world. Due to this incredible change in the nineteenth century, the institutionalized current water framework is utilized comparably in created nations. | current water framework. Around then, examination concerning the reason for cholera was confounded; different inaccurate speculations were advanced and right move was not made. Subsequently, the disclosure of vibrio cholera in 1883 and the abatement of water-borne infections, like cholera and typhoid, by the inventory of separated water brought about the sped up spread of an advanced water supply to numerous pieces of the world. Due to this incredible change in the nineteenth century, the normalized present day water framework is utilized comparatively in created nations. |
|               | <b>4.2 Merits and Demerits of Modern Water Systems</b>                                                                                                                                                                                                                                                                                                                                                                                                                                                                                                                                                                                     | <b>4.2 Advantages and Disadvantages of Modern Water Systems</b>                                                                                                                                                                                                                                                                                                                                                                                                                                                                                                                                                                                                    | <b>4.2 Merits and Demerits of Modern Water Systems</b>                                                                                                                                                                                                                                                                                                                                                                                                                                                                                                                                             |
|               | <b>4.2.1 Invisible Water</b>                                                                                                                                                                                                                                                                                                                                                                                                                                                                                                                                                                                                               | <b>4.2.1 Imperceptible Water</b>                                                                                                                                                                                                                                                                                                                                                                                                                                                                                                                                                                                                                                   | <b>4.2.1 Invisible Water</b>                                                                                                                                                                                                                                                                                                                                                                                                                                                                                                                                                                       |
| 1. para-graph | Most of the processes involved in modern water systems are not very visible to the average person, and this negatively affects peoples' relationship with water and thus their water literacy. In fact, there usually is no need to know how and from where water is delivered and how and to where wastewater is transferred. People see water only when they use it. This causes that they do not actually know much about water, although they use it every day.                                                                                                                                                                        | A large portion of the procedures engaged with current water frameworks are not entirely obvious to the normal individual, and this adversely influences peoples' association with water and in this way their water education. Truth be told, there for the most part is no compelling reason to know how and from where water is conveyed and how and to where wastewater is moved. Individuals see water just when they use it. This causes they don't really think a lot about water, despite the fact that they use it consistently.                                                                                                                          | The vast majority of the cycles associated with current water frameworks are not truly noticeable to the normal individual, and this contrarily influences peoples' relationship with water and accordingly their water proficiency. Truth be told, there for the most part is no compelling reason to know how and from where water is conveyed and how and to where wastewater is moved. Individuals see water just when they use it. This causes that they don't really think a lot about water, in spite of the fact that they use it consistently.                                            |
| 2. para-graph | Before modern water systems, people could not help thinking about water every day. For instance, they had to contrive ways to obtain clean water from rivers, which were often muddy when rain                                                                                                                                                                                                                                                                                                                                                                                                                                             | Prior to current water frameworks, individuals couldn't resist considering water each day. For example, they needed to imagine approaches to get perfect water from streams, which were regularly sloppy when downpour worked up the residue. Along these                                                                                                                                                                                                                                                                                                                                                                                                          | Prior to present day water frameworks, individuals couldn't resist contemplating water each day. For example, they needed to devise approaches to acquire clean water from waterways, which were frequently sloppy when downpour worked up the dregs. Along                                                                                                                                                                                                                                                                                                                                        |

|              |                                                                                                                                                                                                                                                                                                                                                                                                                                                                                                                                                                                                                                                           |                                                                                                                                                                                                                                                                                                                                                                                                                                                                                                                                                                                                                                                                                                                        |                                                                                                                                                                                                                                                                                                                                                                                                                                                                                                                                                                                                                                                                                                                   |
|--------------|-----------------------------------------------------------------------------------------------------------------------------------------------------------------------------------------------------------------------------------------------------------------------------------------------------------------------------------------------------------------------------------------------------------------------------------------------------------------------------------------------------------------------------------------------------------------------------------------------------------------------------------------------------------|------------------------------------------------------------------------------------------------------------------------------------------------------------------------------------------------------------------------------------------------------------------------------------------------------------------------------------------------------------------------------------------------------------------------------------------------------------------------------------------------------------------------------------------------------------------------------------------------------------------------------------------------------------------------------------------------------------------------|-------------------------------------------------------------------------------------------------------------------------------------------------------------------------------------------------------------------------------------------------------------------------------------------------------------------------------------------------------------------------------------------------------------------------------------------------------------------------------------------------------------------------------------------------------------------------------------------------------------------------------------------------------------------------------------------------------------------|
|              | stirred up the sediment. Thus, people filtered water through sand to remove impurities. In periods of limited rainfall, they would restrict the amount of water they used. However, when communities started to become free of such considerations, they did not have to be so conscious about daily water usage. It can be said that sanitary water can be secured, even though people have no awareness of the processes used to supply water; it can also be said that the priority to the hygiene side causes no conscious and huge gap between water and humans. This causes the mistrust and uncertainty about water, as well as heavy consumption. | lines, individuals separated water through sand to evacuate polluting influences. In times of constrained precipitation, they would limit the measure of water they utilized. Be that as it may, when networks began to turn out to be liberated from such contemplations, they didn't need to be so cognizant about day by day water use. It very well may be said that clean water can be verified, despite the fact that individuals have no attention to the procedures used to supply water; it can likewise be said that the need to the cleanliness side causes no cognizant and enormous hole among water and people. This causes the question and vulnerability about water, just as substantial utilization. | these lines, individuals separated water through sand to eliminate pollutions. In times of restricted precipitation, they would limit the measure of water they utilized. Be that as it may, when networks began to turn out to be liberated from such contemplations, they didn't need to be so cognizant about day by day water utilization. It very well may be said that sterile water can be gotten, despite the fact that individuals have no consciousness of the cycles used to supply water; it can likewise be said that the need to the cleanliness side causes no cognizant and colossal hole among water and people. This causes the doubt and vulnerability about water, just as hefty utilization. |
|              | <b>4.2.2 Mass Consumption and Its Effect</b>                                                                                                                                                                                                                                                                                                                                                                                                                                                                                                                                                                                                              | <b>4.2.2 Quantity Ingesting and Its Outcome</b>                                                                                                                                                                                                                                                                                                                                                                                                                                                                                                                                                                                                                                                                        | <b>4.2.2 Mass Consumption and Its Effect</b>                                                                                                                                                                                                                                                                                                                                                                                                                                                                                                                                                                                                                                                                      |
| 1. paragraph | Modernization spread mass production and mass consumption. With regard to water, uniform water use by modern water systems resulted in mass consumption of water. Intensive and rational production prevented people from seeing the true nature of the issues, and the problems at production sites are exactly the same as invisible water.                                                                                                                                                                                                                                                                                                             | Modernization spread large scale manufacturing and mass utilization. As to water, uniform water use by current water frameworks brought about mass utilization of water. Serious and sane creation kept individuals from seeing the genuine idea of the issues, and the issues at generation locales are actually equivalent to imperceptible water.                                                                                                                                                                                                                                                                                                                                                                   | Modernization spread large scale manufacturing and mass utilization. Concerning water, uniform water use by current water frameworks brought about mass utilization of water. Concentrated and level headed creation kept individuals from seeing the real essence of the issues, and the issues at creation locales are actually equivalent to imperceptible water.                                                                                                                                                                                                                                                                                                                                              |
| 2. paragraph | Social needs for sanitation forwarded the construction of modern water systems; their essential objective is to supply enough quality water to everyone. Judging from the decrease of water-borne diseases, it is obvious that healthy and safe living was promoted by this water system. On the other hand, "enough water" continued increasing, and it was changed from the "essential amount" into "as much as they want." For example, in Tokyo, the average water consumption, which was about                                                                                                                                                       | Social requirements for sanitation sent the development of current water frameworks; their fundamental target is to supply enough quality water to everybody. In light of the abatement of water-borne sicknesses, clearly solid and safe living was advanced by this water framework. Then again, "enough water" kept expanding, and it was transformed from the "basic sum" into "as much as they need." For instance, in Tokyo, the normal water utilization, which were about 100L/p/d at start of the twentieth century,                                                                                                                                                                                          | Social requirements for disinfection sent the development of present-day water frameworks; their fundamental goal is to supply sufficient quality water to everybody. Based on the decline of water-borne infections, clearly sound and safe living was advanced by this water framework. Then again, "enough water" kept expanding, and it was transformed from the "fundamental sum" into "however much they need." For instance, in Tokyo, the normal water utilization, which was about 100L/p/d at start of the twentieth                                                                                                                                                                                    |

|              |                                                                                                                                                                                                                                                                                                                                                                                                                                                                                                                                                                                                                                                                    |                                                                                                                                                                                                                                                                                                                                                                                                                                                                                                                                                                                                                                                                                       |                                                                                                                                                                                                                                                                                                                                                                                                                                                                                                                                                                                                                                                                                        |
|--------------|--------------------------------------------------------------------------------------------------------------------------------------------------------------------------------------------------------------------------------------------------------------------------------------------------------------------------------------------------------------------------------------------------------------------------------------------------------------------------------------------------------------------------------------------------------------------------------------------------------------------------------------------------------------------|---------------------------------------------------------------------------------------------------------------------------------------------------------------------------------------------------------------------------------------------------------------------------------------------------------------------------------------------------------------------------------------------------------------------------------------------------------------------------------------------------------------------------------------------------------------------------------------------------------------------------------------------------------------------------------------|----------------------------------------------------------------------------------------------------------------------------------------------------------------------------------------------------------------------------------------------------------------------------------------------------------------------------------------------------------------------------------------------------------------------------------------------------------------------------------------------------------------------------------------------------------------------------------------------------------------------------------------------------------------------------------------|
|              | 100L/p/d at beginning of the 20th century, reached about 400L/p/d at the end of the 20th century. In other words, it quadrupled in 100 years, along with the development of the modern water system. Of course, in the background, the water demand has increased according to economic developments. However, it was the modern water system that has achieved an increase in the supply in order to fill the demand.                                                                                                                                                                                                                                             | came to about 400L/p/d toward the finish of the twentieth century. As it were, it quadrupled in 100 years, alongside the advancement of the cutting edge water framework. Obviously, out of sight, the water request has expanded by financial improvements. In any case, it was the advanced water framework that has accomplished an expansion in the stockpile so as to fill the interest.                                                                                                                                                                                                                                                                                         | century, reached about 400L/p/d toward the finish of the twentieth century. All in all, it quadrupled in 100 years, alongside the improvement of the cutting edge water framework. Obviously, behind the scenes, the water request has expanded by monetary turns of events. Notwithstanding, it was the cutting edge water framework that has accomplished an increment in the stockpile to fill the interest.                                                                                                                                                                                                                                                                        |
| 3. paragraph | What I want to point out here is not the increase of water consumption itself, but its various subsidiary influences. For example, dam construction, which aimed aims toward the new development of water resources to meet the increasing demand for water, has caused environmental concern in its disruption of the ecosystems of rivers where dams have been constructed, as well as social issues resulting from inhabitants' eviction. Dams are constructed at the upper portions of rivers, which are actually far away from urban centers. The ecosystems and citizens far away from the city make the sacrifice to fill the demand for water in the city. | What I need to call attention to here isn't simply the expansion of water utilization, however its different auxiliary impacts. For instance, dam development, which pointed points toward the new improvement of water assets to fulfil the expanding need for water, has caused ecological worry in its interruption of the environments of waterways where dams have been built, just as social issues coming about because of inhabitants' removal. Dams are developed at the upper bits of waterways, which are in reality far away from urban focuses. The biological systems and residents far away from the city make the penance to fill the interest for water in the city. | What I need to call attention to here isn't simply the increment of water utilization, yet its different auxiliary impacts. For instance, dam development, which pointed points toward the new advancement of water assets to satisfy the expanding need for water, has caused ecological worry in its interruption of the biological systems of streams where dams have been built, just as friendly issues coming about because of inhabitants' removal. Dams are developed at the upper parts of waterways, which are really far away from metropolitan focuses. The environments and residents far away from the city make the penance to fill the interest for water in the city. |
| 4. paragraph | In Japan in particular, as the main water resources are rivers, an increase in intake means a decrease in the volume flowing down the river. Although waste water returns to the river after sewage treatment, the volume of water flowing between the intake point and the discharge point after sewage treatment decreases remarkably. In general, river pollution is caused by the balance of the river flow and the pollution inflow load. A decrease of river                                                                                                                                                                                                 | ---                                                                                                                                                                                                                                                                                                                                                                                                                                                                                                                                                                                                                                                                                   | In Japan specifically, as the principal water assets are waterways, an increment in admission implies an abatement in the volume streaming down the waterway. Albeit squander water gets back to the stream after sewage treatment, the volume of water streaming between the admission point and the release point after sewage treatment diminishes astoundingly. When all is said in done, waterway contamination is brought about by the equilibrium of the                                                                                                                                                                                                                        |

|               |                                                                                                                                                                                                                                                                                                                                                                                                                                                                                                                                                                                                                                                                                                                                                                                                                                                                                                                                                                                                                                    |                                                                                                                                                                                                                                                                                                                                                                                                                                                                                                                                                                                                                                                                                                                                                                                                                                                                                                                                                                                                                                                                                                 |                                                                                                                                                                                                                                                                                                                                                                                                                                                                                                                                                                                                                                                                                                                                                                                                                                                                                                                                                                                                                                                              |
|---------------|------------------------------------------------------------------------------------------------------------------------------------------------------------------------------------------------------------------------------------------------------------------------------------------------------------------------------------------------------------------------------------------------------------------------------------------------------------------------------------------------------------------------------------------------------------------------------------------------------------------------------------------------------------------------------------------------------------------------------------------------------------------------------------------------------------------------------------------------------------------------------------------------------------------------------------------------------------------------------------------------------------------------------------|-------------------------------------------------------------------------------------------------------------------------------------------------------------------------------------------------------------------------------------------------------------------------------------------------------------------------------------------------------------------------------------------------------------------------------------------------------------------------------------------------------------------------------------------------------------------------------------------------------------------------------------------------------------------------------------------------------------------------------------------------------------------------------------------------------------------------------------------------------------------------------------------------------------------------------------------------------------------------------------------------------------------------------------------------------------------------------------------------|--------------------------------------------------------------------------------------------------------------------------------------------------------------------------------------------------------------------------------------------------------------------------------------------------------------------------------------------------------------------------------------------------------------------------------------------------------------------------------------------------------------------------------------------------------------------------------------------------------------------------------------------------------------------------------------------------------------------------------------------------------------------------------------------------------------------------------------------------------------------------------------------------------------------------------------------------------------------------------------------------------------------------------------------------------------|
|               | flow, even if it is temporary, may lead to river pollution, and thereby influence the ecosystem.                                                                                                                                                                                                                                                                                                                                                                                                                                                                                                                                                                                                                                                                                                                                                                                                                                                                                                                                   |                                                                                                                                                                                                                                                                                                                                                                                                                                                                                                                                                                                                                                                                                                                                                                                                                                                                                                                                                                                                                                                                                                 | stream and the contamination inflow load. A reduction of waterway stream, regardless of whether it is brief, may prompt waterway contamination, and in this manner impact the environment.                                                                                                                                                                                                                                                                                                                                                                                                                                                                                                                                                                                                                                                                                                                                                                                                                                                                   |
|               | <b>4.2.3 Distrust for Water</b>                                                                                                                                                                                                                                                                                                                                                                                                                                                                                                                                                                                                                                                                                                                                                                                                                                                                                                                                                                                                    | <b>4.2.3 Suspicion for Water:-</b>                                                                                                                                                                                                                                                                                                                                                                                                                                                                                                                                                                                                                                                                                                                                                                                                                                                                                                                                                                                                                                                              | <b>4.2.3 Distrust for Water</b>                                                                                                                                                                                                                                                                                                                                                                                                                                                                                                                                                                                                                                                                                                                                                                                                                                                                                                                                                                                                                              |
| 1. para-graph | There are many users of modern water systems who mistrust and are worried about the quality and safety of tap water. This results from the lack of knowledge about water the lack of and understanding the importance of water. People cannot imagine the processes involved in water delivery and do not understand or feel the necessity of having safe, clean water. Therefore, they cannot feel the reality for the safeness and cleanliness, and cannot understand the cost of clean water and the importance of water resources. In addition, this lack of knowledge and understanding contributes to inaccurate media reports. Shockingly, the media sometimes reports that tap water is dangerous. This might promote the cautious feeling about tap water more than is necessary. Furthermore, the increase of the issues we have to consider, such as traces of chemical substances and endocrine disrupters, makes people confused, and their mistrust and insecurity concerning the water supply are steadily growing. | There are numerous clients of present day water frameworks who question and are stressed over the quality and wellbeing of faucet water. These outcomes from the absence of information about water the absence of and understanding the significance of water. Individuals can't envision the procedures associated with water conveyance and don't comprehend or feel the need of having protected, clean water. Subsequently, they can't feel the truth for the safeness and neatness, and can't comprehend the expense of clean water and the significance of water assets. What's more, this absence of information and comprehension adds to off base media reports. Amazingly, the media now and again reports that faucet water is hazardous. This may advance the mindful inclination about faucet water more than is fundamental. Besides, the expansion of the issues we need to consider, for example, hints of compound substances and endocrine disrupters, makes individuals befuddled, and their doubt and uncertainty concerning the water supply are consistently developing. | There are numerous clients of present day water frameworks who question and are stressed over the quality and security of faucet water. This outcomes from the absence of information about water the absence of and understanding the significance of water. Individuals can't envision the cycles engaged with water conveyance and don't comprehend or feel the need of having protected, clean water. Thusly, they can't feel the truth for the safeness and neatness, and can't comprehend the expense of clean water and the significance of water assets. Also, this absence of information and comprehension adds to wrong media reports. Amazingly, the media in some cases reports that faucet water is perilous. This may advance the careful inclination about faucet water more than is needed. Besides, the increment of the issues we need to consider, like hints of synthetic substances and endocrine disrupters, makes individuals befuddled, and their question and uncertainty concerning the water supply are consistently developing. |
| 2. para-graph | Not to be manipulated by mass media and promotions, governments and experts should provide accurate information to citizens. This is the water literacy needed for governments and experts. It is                                                                                                                                                                                                                                                                                                                                                                                                                                                                                                                                                                                                                                                                                                                                                                                                                                  | Not to be controlled by broad communications and advancements, governments and specialists ought to give precise data to residents. This is the water education required for governments and specialists. It is additionally significant for the residents to have free                                                                                                                                                                                                                                                                                                                                                                                                                                                                                                                                                                                                                                                                                                                                                                                                                         | Not to be controlled by broad communications and advancements, governments and specialists ought to give precise data to residents. This is the water education required for governments and specialists. It is                                                                                                                                                                                                                                                                                                                                                                                                                                                                                                                                                                                                                                                                                                                                                                                                                                              |

|              |                                                                                                                                                                                                                                                                                                                                                                                                                                                                                                                                                                                                                                                                                                                                                                                                                                                                       |                                                                                                                                                                                                                                                                                                                                                                                                                                                                                                                                                                                                                                                                                                                                                                                                                                                                                                        |                                                                                                                                                                                                                                                                                                                                                                                                                                                                                                                                                                                                                                                                                                                                                                                                                                                                                                                                                      |
|--------------|-----------------------------------------------------------------------------------------------------------------------------------------------------------------------------------------------------------------------------------------------------------------------------------------------------------------------------------------------------------------------------------------------------------------------------------------------------------------------------------------------------------------------------------------------------------------------------------------------------------------------------------------------------------------------------------------------------------------------------------------------------------------------------------------------------------------------------------------------------------------------|--------------------------------------------------------------------------------------------------------------------------------------------------------------------------------------------------------------------------------------------------------------------------------------------------------------------------------------------------------------------------------------------------------------------------------------------------------------------------------------------------------------------------------------------------------------------------------------------------------------------------------------------------------------------------------------------------------------------------------------------------------------------------------------------------------------------------------------------------------------------------------------------------------|------------------------------------------------------------------------------------------------------------------------------------------------------------------------------------------------------------------------------------------------------------------------------------------------------------------------------------------------------------------------------------------------------------------------------------------------------------------------------------------------------------------------------------------------------------------------------------------------------------------------------------------------------------------------------------------------------------------------------------------------------------------------------------------------------------------------------------------------------------------------------------------------------------------------------------------------------|
|              | also important for the citizens to have independent-minded attitudes in order to make judgments based on scientific proof. For that revolution in attitude, basic knowledge regarding their own use of water, the understanding of it, and the ability to judge and act according to knowledge and understanding are required. This is water literacy.                                                                                                                                                                                                                                                                                                                                                                                                                                                                                                                | disapproved of mentalities so as to make decisions dependent on logical verification. For that transformation in demeanor, fundamental information with respect to their own utilization of water, its comprehension, and the capacity to pass judgment and act as per information and comprehension are required. This is water education                                                                                                                                                                                                                                                                                                                                                                                                                                                                                                                                                             | likewise significant for the residents to have free disapproved of mentalities to make decisions dependent on logical evidence. For that upset in mentality, essential information in regards to their own utilization of water, its comprehension, and the capacity to pass judgment and act as indicated by information and comprehension are required. This is water education.                                                                                                                                                                                                                                                                                                                                                                                                                                                                                                                                                                   |
|              | <b>5. Effectiveness of the concept of Water Literacy</b>                                                                                                                                                                                                                                                                                                                                                                                                                                                                                                                                                                                                                                                                                                                                                                                                              | <b>Effectiveness of the idea of Water Literacy</b>                                                                                                                                                                                                                                                                                                                                                                                                                                                                                                                                                                                                                                                                                                                                                                                                                                                     | <b>5. Adequacy of the idea of Water Literacy</b>                                                                                                                                                                                                                                                                                                                                                                                                                                                                                                                                                                                                                                                                                                                                                                                                                                                                                                     |
| 1. paragraph | First of all, water literacy enables us to re-evaluate local water systems and water usage. From the perspective of modern systems, local water systems are apt to be perceived as immature and inferior, but they are nothing of the kind. Rather, they promote active living water literacy, as is proved by the Chiang Mai study. Each region and each city has a distinctive lifestyle. This lifestyle fits the available resources, including water resources, the climate, and the geographic character of the area. It is the lifestyle that enables inhabitants to acquire water literacy naturally in daily life. It might be a new method of development to refrain from transforming the local lifestyle to the new one by urbanization, modernization and system construction, but rather to maintain it and take advantage of the living water literacy. | Most importantly, water education empowers us to rethink nearby water frameworks and water use. From the point of view of current frameworks, nearby water frameworks are able to be seen as youthful and mediocre; however, they are nothing of the sort. Or maybe, they advance dynamic living water education, as is demonstrated by the Chiang Mai study. Every locale and every city has an unmistakable way of life. This way of life fits the accessible assets, including water assets, the atmosphere, and the geographic character of the territory. The way of life empowers occupants to secure water literacy normally in day by day life. It may be another strategy for improvement to abstain from changing the neighborhood way of life to the enhanced one by urbanization, modernization and framework development, yet rather to keep up it and exploit the living water literacy. | As a matter of first importance, water proficiency empowers us to rethink neighborhood water frameworks and water utilization. From the point of view of present day frameworks, neighborhood water frameworks are adept to be seen as youthful and subpar, however they aren't anything of the sort. Or maybe, they advance dynamic living water education, as is demonstrated by the Chiang Mai study. Every locale and every city has a particular way of life. This way of life fits the accessible assets, including water assets, the environment, and the geographic character of the zone. The way of life empowers occupants to secure water proficiency normally in day by day life. It very well may be another strategy for improvement to abstain from changing the nearby way of life to the upgraded one by urbanization, modernization and framework development, yet rather to keep up it and exploit the living water proficiency. |
| 2. paragraph | Originally, modern water systems aimed to sustainably realize safe living, but currently, the method has been emphasized and the system has become far from sustainable. The future, including                                                                                                                                                                                                                                                                                                                                                                                                                                                                                                                                                                                                                                                                        | Initially, present day water frameworks meant to economically acknowledge safe living, however right now, the technique has been accentuated and the framework has gotten a long way from practical.                                                                                                                                                                                                                                                                                                                                                                                                                                                                                                                                                                                                                                                                                                   | Initially, present day water frameworks meant to reasonably acknowledge safe living, yet right now, the technique has been stressed and the framework has                                                                                                                                                                                                                                                                                                                                                                                                                                                                                                                                                                                                                                                                                                                                                                                            |

|               |                                                                                                                                                                                                                                                                                                                                                                                                                                                                                                                                                                                                                                                                                                                                                                                                                                  |                                                                                                                                                                                                                                                                                                                                                                                                                                                                                                                                                                                                                                                                                                                                                                                                                                                                                                                    |                                                                                                                                                                                                                                                                                                                                                                                                                                                                                                                                                                                                                                                                                                                                                                                                                                                                                                                  |
|---------------|----------------------------------------------------------------------------------------------------------------------------------------------------------------------------------------------------------------------------------------------------------------------------------------------------------------------------------------------------------------------------------------------------------------------------------------------------------------------------------------------------------------------------------------------------------------------------------------------------------------------------------------------------------------------------------------------------------------------------------------------------------------------------------------------------------------------------------|--------------------------------------------------------------------------------------------------------------------------------------------------------------------------------------------------------------------------------------------------------------------------------------------------------------------------------------------------------------------------------------------------------------------------------------------------------------------------------------------------------------------------------------------------------------------------------------------------------------------------------------------------------------------------------------------------------------------------------------------------------------------------------------------------------------------------------------------------------------------------------------------------------------------|------------------------------------------------------------------------------------------------------------------------------------------------------------------------------------------------------------------------------------------------------------------------------------------------------------------------------------------------------------------------------------------------------------------------------------------------------------------------------------------------------------------------------------------------------------------------------------------------------------------------------------------------------------------------------------------------------------------------------------------------------------------------------------------------------------------------------------------------------------------------------------------------------------------|
|               | water literacy, will promote going back to the original purpose.                                                                                                                                                                                                                                                                                                                                                                                                                                                                                                                                                                                                                                                                                                                                                                 | The future, including water literacy, will elevate returning to the first reason.                                                                                                                                                                                                                                                                                                                                                                                                                                                                                                                                                                                                                                                                                                                                                                                                                                  | gotten a long way from feasible. The future, including water education, will elevate returning to the first reason.                                                                                                                                                                                                                                                                                                                                                                                                                                                                                                                                                                                                                                                                                                                                                                                              |
| 3. para-graph | Secondly, water literacy educates those citizens who are able to associate daily life with social issues. The whole of society needs the above-mentioned three levels of water literacy, although the concrete contents vary from one region to another. Behaviors, which fit for each water literacy aspect, are not specified universally; they appear in various forms depending on the local situation. Further, to think about human survival and daily life by practical and living water literacy, and to be conscious of the social water literacy that considers overall society enables people to understand the relationship between daily water use and problems occurred in the environment and society. Promotion of changes in the consciousness of citizens is necessary to reduce problems as much as possible. | Besides, water literacy instructs those residents who can connect day by day existence with social issues. The entire of society needs the previously mentioned three degrees of water literacy, despite the fact that the solid substance differs starting with one district then onto the next. Practices, which fit for each water literacy angle, are not determined all around; they show up in different structures relying upon the neighborhood circumstance. Further, to consider human endurance and everyday life by common sense and living water literacy, and to be aware of the social water education that considers in general society empowers individuals to comprehend the connection between day by day water use and issues happened in nature and society. Advancement of changes in the awareness of residents is important to lessen issues however much as could reasonably be expected. | Furthermore, water proficiency instructs those residents who can connect every day existence with social issues. The entire of society needs the previously mentioned three degrees of water education, albeit the solid substance differ starting with one area then onto the next. Practices, which fit for each water proficiency perspective, are not indicated all around; they show up in different structures relying upon the nearby circumstance. Further, to consider human endurance and every day everyday routine by viable and experiencing water education, and to be aware of the social water proficiency that considers generally society empowers individuals to comprehend the connection between day by day water use and issues happened in the climate and society. Advancement of changes in the awareness of residents is important to lessen issues however much as could be expected. |
|               |                                                                                                                                                                                                                                                                                                                                                                                                                                                                                                                                                                                                                                                                                                                                                                                                                                  | <b>Conclusion:</b>                                                                                                                                                                                                                                                                                                                                                                                                                                                                                                                                                                                                                                                                                                                                                                                                                                                                                                 |                                                                                                                                                                                                                                                                                                                                                                                                                                                                                                                                                                                                                                                                                                                                                                                                                                                                                                                  |
| 4. para-graph | Third, water literacy contributes to the recovery of a variety of relations between water and humans. Evaluating living water literacy and taking advantage of local customs and characteristics may lead to the retention of a well- rounded relationship between water and humans. Even in a developed area with a modern water system, a water system centering on social water literacy might recreate a rich relations between water and humans.                                                                                                                                                                                                                                                                                                                                                                            | Third, water literacy adds to the recuperation of an assortment of relations among water and people. Assessing living water education and exploiting neighborhood customs and qualities may prompt the maintenance of a balanced connection among water and people. Indeed, even in a created territory with a cutting edge water framework, a water framework focusing on social water education may reproduce rich relations among water and people.                                                                                                                                                                                                                                                                                                                                                                                                                                                             | Third, water proficiency adds to the recuperation of an assortment of relations among water and people. Assessing living water education and exploiting neighborhood customs and attributes may prompt the maintenance of a balanced connection among water and people. Indeed, even in a created region with a cutting edge water framework, a water framework focusing on friendly water education may reproduce a rich relations among water and people.                                                                                                                                                                                                                                                                                                                                                                                                                                                      |



|               |                                                                                                                                                                                                                                                                                                                                                                                                                                                                                                                                                                                                                                                                                                                                                                                |                                                                                                                                                                                                                                                                                                                                                                                                                                                                                                                                                                                                                                                                                                                                                                                                                                            |                                                                                                                                                                                                                                                                                                                                                                                                                                                                                                                                                                                                                                                                                                                                                                                                                                                 |
|---------------|--------------------------------------------------------------------------------------------------------------------------------------------------------------------------------------------------------------------------------------------------------------------------------------------------------------------------------------------------------------------------------------------------------------------------------------------------------------------------------------------------------------------------------------------------------------------------------------------------------------------------------------------------------------------------------------------------------------------------------------------------------------------------------|--------------------------------------------------------------------------------------------------------------------------------------------------------------------------------------------------------------------------------------------------------------------------------------------------------------------------------------------------------------------------------------------------------------------------------------------------------------------------------------------------------------------------------------------------------------------------------------------------------------------------------------------------------------------------------------------------------------------------------------------------------------------------------------------------------------------------------------------|-------------------------------------------------------------------------------------------------------------------------------------------------------------------------------------------------------------------------------------------------------------------------------------------------------------------------------------------------------------------------------------------------------------------------------------------------------------------------------------------------------------------------------------------------------------------------------------------------------------------------------------------------------------------------------------------------------------------------------------------------------------------------------------------------------------------------------------------------|
| 5. para-graph | The 20th century was the age of the expansion of modern water systems from the West to the world. The diversification of the relation between water and people was lost, and at the same time, water literacy was disrespected. The 21st century is an age in which diverse cultures accept individual differences, and aim at coexistence and sustainable. The relation between water and people is the same. As the next step toward universality and stability, it is important to aspire to the coexistence of diversity. That's really the sustainable development of global-scale. Thus, diversified technology should be introduced and various policies should be promoted that depend on the local environment and culture to maintain a stable supply of safe water. | The twentieth century was the age of the development of present day water frameworks from the West to the world. The broadening of the connection among water and individuals was lost, and simultaneously, water literacy was affronted. The 21st century is an age wherein various societies acknowledge singular contrasts, and focus on concurrence and manageable. The connection among water and individuals is the equivalent. As the subsequent stage toward comprehensiveness and security, it is critical to try to the concurrence of decent variety. That's actually the manageable improvement of worldwide scale. Along these lines, expanded innovation ought to be presented and different strategies ought to be advanced that rely upon the neighborhood condition and culture to keep up a steady supply of safe water. | The twentieth century was the age of the extension of present day water frameworks from the West to the world. The enhancement of the connection among water and individuals was lost, and simultaneously, water proficiency was affronted. The 21st century is an age wherein different societies acknowledge singular contrasts, and focus on concurrence and maintainable. The connection among water and individuals is something very similar. As the subsequent stage toward comprehensiveness and soundness, it is essential to try to the concurrence of variety. That's actually the feasible improvement of worldwide scale. Along these lines, expanded innovation ought to be presented and different approaches ought to be advanced that rely upon the neighborhood climate and culture to keep a steady inventory of safe water. |
| 6. para-graph | The final goal of introducing the concept of water literacy is the construction of a water system that enables us to live by balancing our consideration of "existing as a human being," "living our daily life" and "coexisting in a society." Such a water system is not supposed to be universal, but should rather be diversified according to the local way of living and local customs.                                                                                                                                                                                                                                                                                                                                                                                  | The last objective of presenting the idea of water literacy is the development of a water framework that empowers us to live by adjusting our thought of existing as a person, carrying on with our everyday life and coinciding in a general public. Such a water framework should be all inclusive, however ought to rather be enhanced by the nearby method for living and neighborhood customs.                                                                                                                                                                                                                                                                                                                                                                                                                                        | The last objective of presenting the idea of water proficiency is the development of a water framework that empowers us to live by adjusting our thought of "existing as an individual," "carrying on with our every day life" and "coinciding in a general public." Such a water framework should be all inclusive, however ought to rather be enhanced by the neighborhood method of living and nearby traditions.                                                                                                                                                                                                                                                                                                                                                                                                                            |
|               |                                                                                                                                                                                                                                                                                                                                                                                                                                                                                                                                                                                                                                                                                                                                                                                | <b>Suggestions:</b>                                                                                                                                                                                                                                                                                                                                                                                                                                                                                                                                                                                                                                                                                                                                                                                                                        |                                                                                                                                                                                                                                                                                                                                                                                                                                                                                                                                                                                                                                                                                                                                                                                                                                                 |
|               |                                                                                                                                                                                                                                                                                                                                                                                                                                                                                                                                                                                                                                                                                                                                                                                | With little test testing packs and direction, they check the nature of water for its pH, its bacterial substance and its concoction content. They figure out how water channels work and how sump tanks should be kept up for tidiness. The use of water for drinking and for cooking, for the can and for washing dishes is determined and they get familiar with the interest                                                                                                                                                                                                                                                                                                                                                                                                                                                            |                                                                                                                                                                                                                                                                                                                                                                                                                                                                                                                                                                                                                                                                                                                                                                                                                                                 |

|  |                                                                                                                                                                                                                                                                                                                       |                                                                                                                                                                                                                                                                                                                                                                                                                                  |  |
|--|-----------------------------------------------------------------------------------------------------------------------------------------------------------------------------------------------------------------------------------------------------------------------------------------------------------------------|----------------------------------------------------------------------------------------------------------------------------------------------------------------------------------------------------------------------------------------------------------------------------------------------------------------------------------------------------------------------------------------------------------------------------------|--|
|  |                                                                                                                                                                                                                                                                                                                       | put on water. They figure out how to see where the pre-owned water goes and whether it is dealt with or left untreated                                                                                                                                                                                                                                                                                                           |  |
|  |                                                                                                                                                                                                                                                                                                                       | Children additionally become mindful about springs, groundwater, its quality and its test as far as fluoride, nitrates and different contaminants that are getting normal. They figure out how to test and recognize great groundwater sources in their towns and towns.                                                                                                                                                         |  |
|  |                                                                                                                                                                                                                                                                                                                       | It requires supported hand holding and an intrigued and submitted gathering to make this conceivable. Assets from organizations and different givers are of extraordinary worth. Working with instructors and the school the board gathering is an expertise that requires significant investment and tolerance to gain.                                                                                                         |  |
|  |                                                                                                                                                                                                                                                                                                                       | In the extraordinary undertaking of a perfect India and in accordance with the Sustainable Development Goals, particularly Goal Ensure accessibility and reasonable administration of water and sanitation for all, it is essential for a general public and a country to put resources into schools and the schoolchildren to assist them with turning out to be water proficient and be insightful stewards of water later on. |  |
|  | <b>References</b>                                                                                                                                                                                                                                                                                                     | <b>References:</b>                                                                                                                                                                                                                                                                                                                                                                                                               |  |
|  | <p>[1] UNESCO, Education for ALL, Literacy for Life, UNESCO Publishing, 2006.</p> <p>[2] King R., Defining literacy in a time of environmental crisis, Journal of Social Philosophy, 2000, vol. 31 no.1, p.68-81</p> <p>[3] Roth C. E., Environmental Literacy: Its Roots, Evolution and Directions in the 1990s,</p> | <p>1. Asian Development Bank (ADB). (2013) Indonesia: Water supply and sanitation sector assessment, strategy, and road map. [e-book] Mandaluyong City, Philippines: Asian Development Bank.</p> <p>2. Ewing M. S. and Mills T.J.,(1994) Water literacy in college freshmen: Could a cognitive imagery strategy improve understanding?, Journal of Environmental Education, 1994, vol. 25, no.4, p.36- 40</p>                    |  |

|  |                                                                                                                                                                                                                                                               |                                                                                                                                                                                                                                                                                |  |
|--|---------------------------------------------------------------------------------------------------------------------------------------------------------------------------------------------------------------------------------------------------------------|--------------------------------------------------------------------------------------------------------------------------------------------------------------------------------------------------------------------------------------------------------------------------------|--|
|  | ERIC/CSMEE Publications, The Ohio State University, 1992.<br>[4] Ewing M. S. and Mills T.J., Water literacy in college freshmen: Could a cognitive imagery strategy improve understanding?, Journal of Environmental Education, 1994, vol. 25, no.4, p.36- 40 | 3. King R.(2000), Defining literacy in a time of environmental crisis, Journal of Social Philosophy, vol. 31 no.1, p.68-81<br>4. Roth C. E (1992)., Environmental Literacy: Its Roots, Evolution and Directions in , ERIC/CSMEE Publications, The Ohio State University, 1992. |  |
|--|---------------------------------------------------------------------------------------------------------------------------------------------------------------------------------------------------------------------------------------------------------------|--------------------------------------------------------------------------------------------------------------------------------------------------------------------------------------------------------------------------------------------------------------------------------|--|

## References

1. Otaki, Y.; Sakura, O.; Otaki, M. Advocating Water Literacy. *Eng. Access* **2015**, *1*, 36–40.
